# Supplementary material for: Behavioral Correlates of COVID-19 Worry: Stigma, Knowledge, and News Source
Source: MDPI journal article supplement (doi:10.3390/ijerph182111436), 2021-10-30
Supplement: s1 [file s1]

**Table S1. Phases of Data collection: Dates, Eligibility Criteria, Response Numbers, and Rationale.**

|                       | Phase               | Start/End date           | Inclusion/Exclusion criteria                                                                                                                                                                           | Total Responses | Rationale                                                                                                                                                   |
|-----------------------|---------------------|--------------------------|--------------------------------------------------------------------------------------------------------------------------------------------------------------------------------------------------------|-----------------|-------------------------------------------------------------------------------------------------------------------------------------------------------------|
| New York State Sample | 1a. NYS Soft-Launch | 07/02/2020 to 07/02/2020 | (1) 18+ years of age, (2) New York State (NYS) resident, (3) previously completed at least 500 MTurk tasks; and (4) 90% approval ratings for previously completed MTurk tasks                          | N= 5            | To test for any flaws in the survey logic or payment mechanism                                                                                              |
|                       | 1b. NYS Launch      | 07/02/2020 to 08/01/2020 | (1) 18+ years of age, (2) NYS resident; (3) previously completed at least 500 MTurk tasks; and (4) 90% approval ratings for previously completed MTurk tasks, and (5) did not complete phase 1 survey. | N = 597         | After a period of diminished participation, it was determined that the slow response rate was attributed to limiting the participant pool to NYS residents. |
| National Sample       | 2. National Launch  | 08/05/2020 to 08/05/2020 | (1) 18+ years of age; (2) previously completed at least 500 MTurk tasks; and (3) 90% approval ratings for previously completed MTurk tasks; and (4) did not complete phase 1 or 2a survey.             | N = 605         | As such, we re-launched the survey without the initial regional-filtering (phase 2).                                                                        |
